# Supplementary material for: SRPK1 promotes cell proliferation and tumor growth of osteosarcoma through activation of the NF-κB signaling pathway
Source: publisher site journal article supplement (doi:10.1515/hsz-2020-0394), 2021-12-29
Supplement: Supplementary file 1 [file j_hsz-2020-0394_suppl.pdf]

# SRPK1 promotes cell proliferation and tumor growth of osteosarcoma through activation of the NF-κB signaling pathway

Yubao Gong, Chen Yang, Zhengren Wei, Jianguo Liu

## Supplementary material

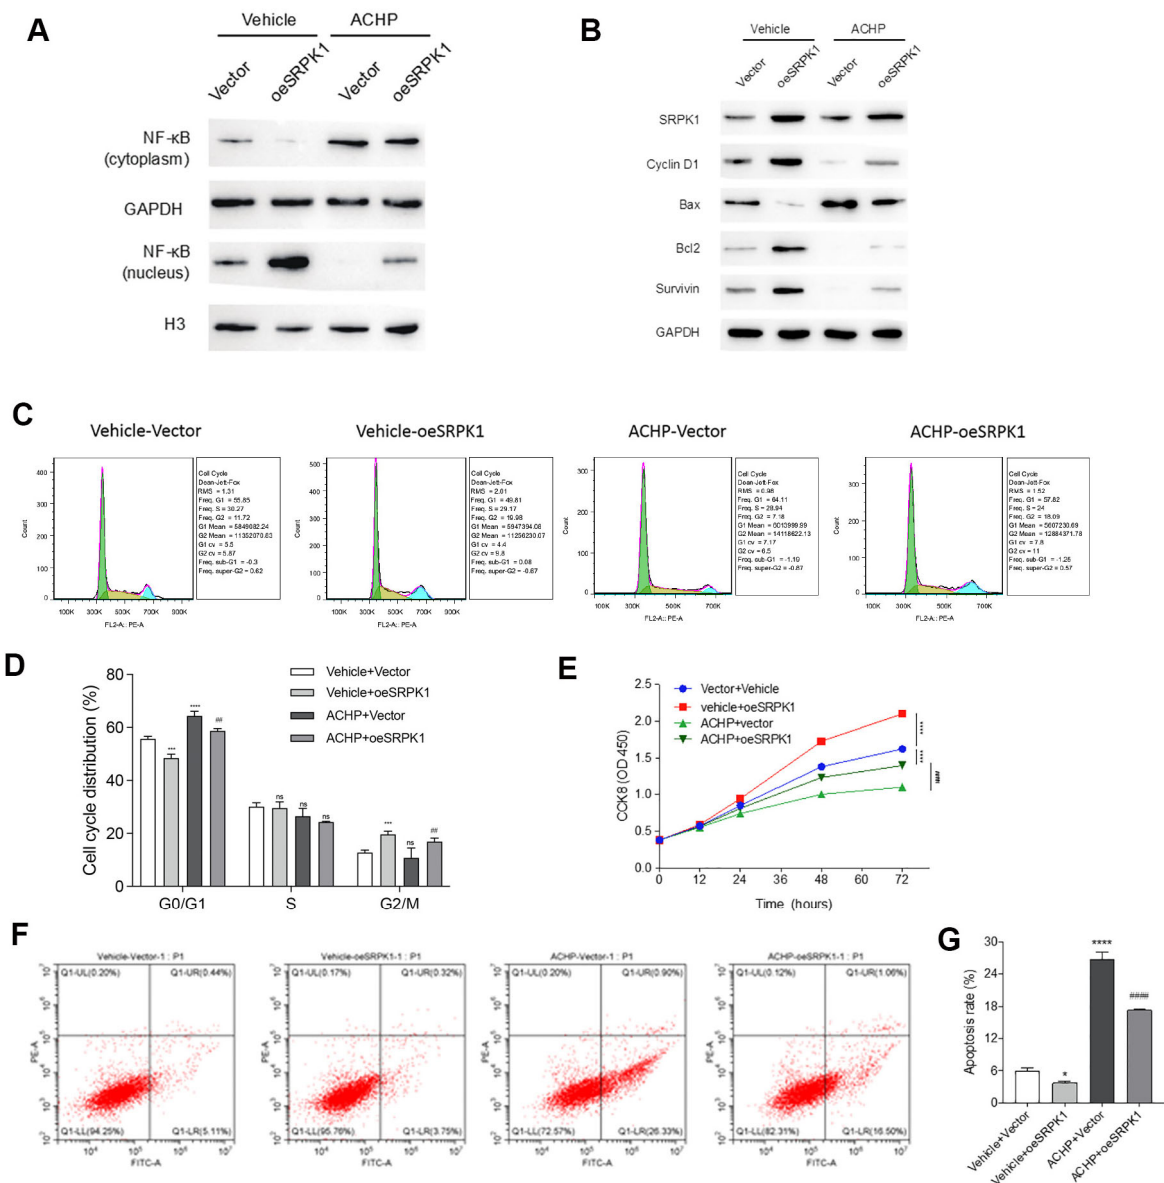

**Supplementary Figure 1** NF-  $\kappa$ B is required for SRPK1-mediated pro-survival signaling.

U2OS stably overexpressing either empty vector (vector) or SRPK1 (oeSRPK1) were treated with vehicle or 10  $\mu$ mo/L ACHP for 48 hours (A-D, F and G) or 12, 24, 48 and 72 hours (E). (A and B) Western blot analysis was performed using indicated antibodies. (C and D) Cell cycle progression was analyzed using flow cytometry. Data were shown as representative flow figures (C) and cumulative data in (D). (E) Cell viability measured by CCK8 assay. (F and G) Cell apoptosis detected by Annexin V/PI dual staining. Data were shown as representative flow figures (F) and cumulative data in (n=3, G). \* $P$ <0.05, \*\*\*\* $P$ <0.0001, ns: no significance, when compared with vector or vehicle+vector group. # $P$ <0.05, #### $P$ <0.0001, when compared with ACHP+Vector group.
